# Supplementary material
Source: publisher figshare collection journal article supplement (https://tandf.figshare.com/ndownloader/files/19071041)
Supplement: Supplementary file 1 [file 19071041]

**Publications resulting from research in the Gold Exploration Models programme 2014-2018**

**Books**

Craw D, MacKenzie DJ. 2016. Macraes orogenic gold deposit (New Zealand) - Origin and development of a World class gold mine. Springer Briefs in World Mineral Deposits 1. Springer, Switzerland. 127 p.

**Book chapters**

Allibone AH, Craw D. 2016. Lithospheric controls on the metallogeny of basement rocks in southern and western New Zealand. In: Christie AB, editor. Mineral deposits of New Zealand – exploration and research. AusIMM Monograph. 31:71–81.

Barker RG, Christie AB. 2016. Mineral exploration in the Northland Region, New Zealand. In: Christie AB, editor. Mineral deposits of New Zealand – exploration and research. AusIMM Monograph. 31:61-69.

Barker RG, Christie AB. 2016. Exploration for epithermal gold-silver deposits in the Hauraki Goldfield, North Island, New Zealand. In: Christie AB, editor. Mineral deposits of New Zealand – exploration and research. AusIMM Monograph. 31:225-236.

Barker RG, Christie AB. 2016. Exploration for epithermal gold-silver deposits in the Taupo Volcanic Zone, North Island, New Zealand. In: Christie AB, editor. Mineral deposits of New Zealand – exploration and research. AusIMM Monograph. 31:325-332.

Barker SLL, Dipple GM. 2018. Exploring for carbonate-hosted ore deposits using carbon and oxygen isotopes. Chapter 8 in Ore Deposits: Origin, Exploration, and Exploitation. Ore Deposits Geophysical Monograph 242:185-207. Wiley-AGU book. ISBN: 9781119290537.

Christie AB. 2016. Exploration of orogenic gold deposits in the Lyell Goldfield, West Coast region. In: Christie AB, editor. Mineral deposits of New Zealand – exploration and research. AusIMM Monograph. 31:109-117.

Christie AB, Henderson SM, Grieve PL. 2016. Exploration of the Wharekirauponga gold-silver prospect, Hauraki Goldfield, Coromandel Volcanic Zone. In: Christie AB, editor. Mineral deposits of New Zealand – exploration and research. AusIMM Monograph. 31:259-271.

Christie AB, Henderson SM, Grieve PL, Howie K. 2016. Exploration of the Muirs Reefs epithermal gold-silver prospect, southern Hauraki Goldfield, Coromandel Volcanic Zone. In: Christie AB, editor. Mineral deposits of New Zealand – exploration and research. AusIMM Monograph. 31:313-323.

Christie AB, Youngson J. 2016. Exploration of the Ophir orogenic gold deposit, Central Otago. In: Christie AB, editor. Mineral deposits of New Zealand – exploration and research. AusIMM Monograph. 31:163-173.

Doyle S, Christie AB, Martin AP. 2016. Exploration and mining at the Macraes orogenic god deposit, east Otago. In: Christie AB, editor. Mineral deposits of New Zealand – exploration and research. AusIMM Monograph. 31:183-189.

Henderson SM, Christie AB, Soengkono S, Henderson D, Howie K, Smith B, Coote JA, Cahill J. 2016. Glass Earth staged exploration for epithermal gold-silver deposits in the southern Hauraki Goldfield and Taupo Volcanic Zone, North Island, 2003-2013. In: Christie AB, editor. Mineral deposits of New Zealand – exploration and research. AusIMM Monograph. 31:237-246.

Henderson SM, Martin AP, Coote JA. 2016. Glass Earth regional gold exploration program in Otago – area selection to mining within ten years. In: Christie AB, editor. Mineral deposits of New Zealand – exploration and research. AusIMM Monograph. 31:141-147.

MacKenzie DJ, Blakemore H, Craw D. 2016. Paragenesis of orogenic mineralisation in the Reefton goldfield, West Coast region. In: Christie AB, editor. Mineral deposits of New Zealand – exploration and research. AusIMM Monograph. 31:125-132.

MacKenzie DJ, Cox S, Craw D. 2016. Gold-bearing normal faults at Oturehua, Central Otago. In: Christie AB, editor. Mineral deposits of New Zealand – exploration and research. AusIMM Monograph. 31:157-162.

MacKenzie DJ, Moore J, Craw D. 2016. Paragenesis of mineralisation in the Hyde-Macraes Shear Zone, east Otago. In: Christie AB, editor. Mineral deposits of New Zealand – exploration and research. AusIMM Monograph. 31:191-198.

MacKenzie DJ, Stephens S, Craw D. 2016. Gold-bearing faults of the Old Man Range, Central Otago. In: Christie AB, editor. Mineral deposits of New Zealand – exploration and research. AusIMM Monograph. 31:175-181.

Martin AP, Cox SC. 2016. On 45 years of gold exploration at Barewood and Nenthorn, compared with 20 years prior to mining at Macraes, east Otago. In: Christie AB, editor. Mineral deposits of New Zealand – exploration and research. AusIMM Monograph. 31:199-206.

Martin AP, MacKenzie DJ. 2016. Rise and Shine orogenic gold prospect, Otago: exploration summary. In: Christie AB, editor. Mineral deposits of New Zealand – exploration and research. AusIMM Monograph. 31:149-157.

Mason A, Scott J, Ritchie T, Stephens S. 2016. The nature and origin of hard rock gold mineralisation in the Aorere Goldfield, North-west Nelson. In: Christie AB, editor. Mineral deposits of New Zealand – exploration and research. AusIMM Monograph. 31:93-98.

Mauk JL, Skinner EG, Fyfe SJ, Menzies AH, Lowers H, Koenig A. 2016. Ore mineralogy and textural zonation in the world-class epithermal Waihi vein system, Hauraki Goldfield. In: Christie AB, editor. Mineral deposits of New Zealand – exploration and research. AusIMM Monograph. 31:293-301.

Mortimer N, Craw D, MacKenzie DJ, Mortensen JK, Ring U, Pitcairn IK. 2016. Cretaceous tectonics and gold mineralisation in the Otago Schist. In: Christie AB, editor. Mineral deposits of New Zealand – exploration and research. AusIMM Monograph. 31:133-140.

Rattenbury MS, Cox SC, Edbrooke SW, Martin AP. 2016. Integrating airborne geophysical data into new geological maps of New Zealand mineral provinces. In: Christie AB, editor. Mineral deposits of New Zealand – exploration and research. AusIMM Monograph. 31:37-43.

Rowland JV, Bahiru EA, Schofield M, Hamilton AR, Pickle R, Zuquim M, de P, Eccles JD. 2016. Tectonic and structural controls on Late Miocene-to-present epithermal gold-silver mineralisation, Northern New Zealand. In: Christie AB, editor. Mineral deposits of New Zealand – exploration and research. AusIMM Monograph. 31:47-258.

Simpson MP. 2016. Exploration and geology of the Waitekauri epithermal gold–silver deposits and prospects, Hauraki Goldfield. In: Christie AB, editor. Mineral deposits of New Zealand – exploration and research. AusIMM Monograph. 31:273-281.

Simpson MP, Stevens MR, Mauk JL, Harris MC, Stuart AGJ. 2016. Exploration and geology of the Karangahake and Rahu epithermal gold-silver deposits, Hauraki goldfield. In: Christie AB, editor. Mineral deposits of New Zealand – exploration and research. AusIMM Monograph. 31:283-292.

Torckler L, Hobbins JM, Christie AB. 2016. Mining and exploration of the epithermal gold-silver deposits at Waihi, Hauraki Goldfield. In: Christie AB, editor. Mineral deposits of New Zealand – exploration and research. AusIMM Monograph. 31:303-312.

Upton P, Craw D. 2016. Coeval emplacement and orogen-parallel transport of gold in oblique convergent orogens. In:  Díaz-Azpiroz M, Brune S, Czeck DM, Leever KA, Fernández C, editors. Tectonics of Oblique Plate Tectonic Settings. Tectonophysics693,Part B:197-209.

**Book section 1-page introductions**

Christie AB. 2016. Introduction to epithermal gold-silver deposits in New Zealand. In: Christie AB, editor. Mineral deposits of New Zealand – exploration and research. AusIMM Monograph. 31:218.

Christie AB. 2016. Introduction to orogenic gold deposits in New Zealand. In: Christie AB, editor. Mineral deposits of New Zealand – exploration and research. AusIMM Monograph. 31:92.

**Journal papers**

Allibone AH, Blakemore H, Gane J, Moore J, MacKenzie DJ, Craw D. 2018. Contrasting structural styles of orogenic gold deposits, Reefton Goldfield, New Zealand. Economic Geology. 113(7):1479-1497. [doi: 10.5382/econgeo.2018.4599](http://dx.doi.org/10.5382/econgeo.2018.4599).

Allibone AH, Jones P, Blakemore, H, CrawD, MacKenzieDJ, MooreJ. 2018. Structural setting of gold mineralisation within the Hyde-Macraes Shear Zone, southern New Zealand. Economic Geology. 113:347-375. [doi: 10.5382/econgeo.2018.4553](http://dx.doi.org/10.5382/econgeo.2018.4553).

Allibone AH, Jones P, Moore J, Craw D, MacKenzie DJ, Blakemore H. 2017. Kilometre-scale structural setting of ore shoots in the Frasers gold deposit, Macraes mine, New Zealand. Ore Geology Reviews. 89:1107-1121. [doi: 10.1016/j.oregeorev.2017.05.019](http://dx.doi.org/10.1016/j.oregeorev.2017.05.019).

Allibone AH, MacKenzie DJ, Turnbull RE, Tulloch AJ, Craw D. 2016. Polymetallic mineralisation associated with Carboniferous I-type granitoids in central Stewart Island, New Zealand. New Zealand Journal of Geology and Geophysics. 59(3):436-456. doi: 10.1080/00288306.2016.1174946.

Allibone AH, MacKenzie DJ, Turnbull RE, Tulloch AJ, Craw D, Palin M. 2016. Polymetallic mineralised veins in ferroan/A-type Cretaceous leucogranite, Stewart Island, New Zealand. New Zealand Journal of Geology and Geophysics. 59(3):457-474. doi: 10.1080/00288306.2016.1174947.

Andrew BS, Barker SLL. 2018. Determination of carbonate vein chemistry using portable X-ray fluorescence and its application to mineral exploration. Geochemistry: Exploration, Environment, Analysis. 18:85-93. doi:10.1144/geochem2016-011

Bahiru EA, Rowland JV, Eccles JD, Kellett RL. 2019. Regional crustal-scale structural control on epithermal deposits within the Hauraki Goldfield, Coromandel Volcanic Zone, New Zealand: insight from integrated geological and aeromagnetic structural patterns. New Zealand Journal of Geology and Geophysics. doi: 10.1080/00288306.2019.1574268.

Barker SJ, Wilson CJN, Morgan DJ, Rowland JV. 2016. Rapid priming, accumulation, and recharge of magma driving recent eruptions at a hyperactive caldera volcano. Geology. 44:323-326.

Barker SLL, Hood S*,* Hughes RM, Richards S. 2019. The lithogeochemical signatures of hydrothermal alteration in the Waihi epithermal district, New Zealand. New Zealand Journal of Geology and Geophysics. doi: 10.1080/00288306.2019.1651345.

Beinlich A, Barker SLL, Dipple GM, Gupta M, Baer DS. 2017. Stable isotope (δ13C, δ18O) analysis of sulphide-bearing carbonate samples using laser absorption spectrometry. Economic Geology 112:693–700.

Blake F, Grant K, MacKenzie DJ, Scott J, Craw D. 2019. Surficial arsenic distribution above gold-mineralised zones in East Otago, New Zealand. New Zealand Journal of Geology and Geophysics. doi: 10.1080/00288306.2019.1647854.

Bouzari F, Hart CJR, Bissig T, Barker SLL. 2016. Hydrothermal alteration revealed by apatite luminescence and chemistry: a potential indicator mineral for exploring covered porphyry copper deposits. Economic Geology. 111:1397-1410.

Campbell KA, Guido DM, Gautret P, Foucher F, Ramboz C, Westall F. 2015. Geyserite in hot-spring siliceous sinter: window on Earth’s hottest terrestrial paleoenvironment and its extreme life. Earth-Science Reviews. 148:44-64. doi:10.1016/j.earscirev.2015.05.009

Caratori Tontini F, Blakely RJ, Stagpoole V, Seebeck H. 2018. Semi-automatic determination of dips and depths of geologic contacts from magnetic data with application to the Turi Fault System, Taranaki Basin, New Zealand. Journal of Applied Geophysics. 150:67-73.

doi: 10.1016/j.jappgeo.2018.01.001

Cave BJ, Pitcairn IK, Craw D, Large RR, Thompson JM, Johnson SC. 2017. A metamorphic mineral source for tungsten in the turbidite-hosted orogenic gold deposits of the Otago Schist, New Zealand. Mineralium Deposita 52(4): 515-537. doi: [10.1007/s00126-016-0677-5](http://dx.doi.org/10.1007/s00126-016-0677-5).

Cave BJ, Stepanov AS, Craw D, Large RR, Halpin JA, Thompson J. 2015. Release of trace elements through the sub-greenschist facies breakdown of detrital rutile to metamorphic titanite in the Otago Schist, New Zealand. Canadian Mineralogist. 53:379-400.

Christie AB. 2019. Introduction to New Zealand hard rock gold deposits and their exploration models. New Zealand Journal of Geology and Geophysics. doi: 10.1080/00288306.2019.1653328

Christie AB, Simpson MP. Barker RG, Brathwaite RL. 2019. Exploration for epithermal Au-Ag deposits in New Zealand: history and strategy. New Zealand Journal of Geology and Geophysics. doi: 10.1080/00288306.2019.1677251.

Craw D. 2017. Placer gold and associated supergene mineralogy at Macraes Flat, East Otago, New Zealand. New Zealand Journal of Geology and Geophysics 60(4):353-367. doi: 10.1080/00288306.2017.1337644.

Craw D. 2018. Gold mobility and biology during tectonic evolution of southern New Zealand. Journal of the Royal Society of New Zealand. 48(2-3):111-126. doi: 10.1080/03036758.2017.1345765.

Craw D, Kerr G. 2017. Geochemistry and mineralogy of contrasting supergene gold alteration zones, southern New Zealand. Applied Geochemistry. 85(A):19-34. doi: 10.1016/j.apgeochem.2017.08.005.

Craw D, MacKenzie DJ, Grieve P. 2015. Supergene gold mobility in orogenic gold deposits, Otago Schist, New Zealand. New Zealand Journal of Geology and Geophysics. 58:123-136. doi: 10.1080/00288306.2014.997746.

Craw D, McLachlan C, Negrini M, Becker N. 2017. Quantification and prediction of bulk gold fineness at placer gold mines: A New Zealand example. In: Dominy S, O'Conner L, Parbhakar-Fox A editors, Special Issue "Geometallurgy”, Minerals 7(11), 226; doi:10.3390/min7110226

Craw D, Mortensen JK, MacKenzie DJ, Pitcairn IK. 2015. Contrasting geochemistry of orogenic gold deposits in Yukon, Canada and Otago, New Zealand. Geochemistry: Exploration, Environment, Analysis. doi:10.1144/geochem2013-262.

Craw D, Upton P. 2014. Graphite reaction weakening of fault rocks, and uplift of the Annapurna Himal, central Nepal. Geosphere. 10:720-731.

Goodwin NRJ, Burgess R, Craw D, Teagle DAH, Ballentine CJ. 2017. Noble gases fingerprint a metasedimentary fluid source in the Macraes orogenic gold deposit, New Zealand. Mineralium Deposita. 52:197–209. doi: 10.1007/s00126-016-0648-x.

Hamilton AR, Campbell KA, Rowland JV, Barker SLL, Guido DM. 2018. Characteristics and variations in sinters of the Coromandel Volcanic Zone: application to epithermal exploration. New Zealand Journal of Geology and Geophysics. doi: 10.1080/00288306.2018.1519514.

Hamilton AR, Campbell KA, Rowland JV, Browne PRL. 2017. The Kohuamuri siliceous sinter as a vector for epithermal mineralisation, Coromandel Volcanic Zone, New Zealand. Mineralium Deposita. 52:181–196. 16 p. doi:10.1007/s00126-016-0658-8

Hamisi J, MacKenzie DJ, Pitcairn IK, Blakemore H, Zack T, Craw D. 2017. [Hydrothermal footprint of the Birthday Reef, Reefton Goldfield, New Zealand](http://www.gu.se/english/research/publication?publicationId=254211). New Zealand Journal of Geology and Geophysics. 60:59-72. doi: 10.1080/00288306.2016.1274332.

Harvey MC, Rowland JV, Chiodini G, Rissman CF, Bloomberg S, Hernández PA, Mazot A, Viveiros F, Werner C. 2015. Heat flux from magmatic hydrothermal systems related to availability of fluid recharge. Journal of Volcanology and Geothermal Research. 302:225-236. [doi: 10.1016/j.jvolgeores.2015.07.003](http://dx.doi.org//10.1016/j.jvolgeores.2015.07.003).

Hu S-Y, Evans K, Craw D, Rempel K, Bourdet J, Dick J, Grice K. 2015. Raman characterisation of carbonaceous material in the Macraes orogenic gold deposit and metasedimentary host rocks, New Zealand. Ore Geology Reviews. 70: 80-95. doi: [10.1016/j.oregeorev.2015.03.021](http://doi.org/10.1016/j.oregeorev.2015.03.021).

Hu S-Y, Evans K, Fisher L, Rempel K, Craw D, Evans NJ, Cumberland S, Robert A, Grice K. 2016. Associations between sulfides, carbonaceous material, gold and other trace elements in polyframboids: implications for the source of orogenic gold deposits, Otago Schist, New Zealand. Geochimica et Cosmochimica Acta. 180:197-213. doi: [10.1016/j.gca.2016.02.021](https://doi.org/10.1016/j.gca.2016.02.021).

Hughes RM, Barker SLL. 2018. Using portable XRF to infer adularia halos within the Waihi Au-Ag system, New Zealand. Geochemistry: Exploration, Environment, Analysis. 18:97-108. https://doi.org/10.1144/geochem2016-006.

Kellett RL, Bromley CJ. 2018. Geophysical signatures of New Zealand epithermal Au-Ag deposits, and methods for new exploration. New Zealand Journal of Geology and Geophysics. doi: 10.1080/00288306.2018.1548494.

Kerr G, Malloch K, Lilly K, Craw D. 2017. Diagenetic alteration of a Mesozoic fluvial gold placer deposit, southern New Zealand. Ore Geology Reviews. 83:14-29.

MacKenzie DJ, Farmer L, Moore J, Craw D. 2016. Contrasting coeval paragenesis of gold and scheelite in an orogenic hydrothermal system, Macraes mine, New Zealand. Ore Geology Reviews. 80:645-657. doi: 10.1016/**j**.oregeorev.2016.08.011.

Malloch K, Kerr G, Craw D. 2017. Placer gold in the Cretaceous Blue Spur Conglomerate at Waitahuna, southern New Zealand. New Zealand Journal of Geology and Geophysics. 60(3):239-254. [doi: 10.1080/00288306.2017.1311931](http://dx.doi.org//10.1080/00288306.2017.1311931).

Mauriohooho K, Barker SLL, Rae, A. 2016. Mapping lithology and hydrothermal alteration in geothermal systems using portable x-ray fluorescence (pXRF): a case study from the Tauhara geothermal system, Taupo Volcanic Zone. Geothermics. 64:125-134. doi**:**10.1016/j.geothermics.2016.03.005.

McLachlan C, Negrini M, Craw D. 2018. Gold and associated minerals in the Waikaia placer gold mine, Northern Southland, New Zealand. New Zealand Journal of Geology and Geophysics. 61:164-179. doi: 10.1080/00288306.2018.1454482.

Mering JA, Barker SLL. 2018. Precise measurement of the hydrogen isotope composition of phyllosilicates by continuous flow off-axis integrated cavity output spectroscopy. Analytical Chemistry. 90:2852-2859. doi: 10.1021/acs.analchem.7b04992.

Mortensen JK, Coote JA, Craw D, MacKenzie DJ. 2018. Early Jurassic felsic and associated mafic meta-igneous rocks in Otago Schist, Central Otago, New Zealand. New Zealand Journal of Geology and Geophysics. 61(2):237-246. doi: 10.1080/00288306.2018.1464032

Pitcairn IK, Craw D, Teagle DAH. 2015. Metabasalts as sources of metals in orogenic gold deposits. Mineralium Deposita. 50:373-390.

Sanchez-Alfaro P, Reich M, Dreisner T, Cembrano J, Aranciba G, Perez-Flores P, Heinrich C, Rowland JV, Tardani D, Lange D, Campos E. 2016. The optimal windows for seismically-enhanced gold precipitation in the epithermal environment. Ore Geology Reviews. 79:463-473. doi: 10.1016/j.oregeorev.2016.06.005.

Simmons SF, Brown KL, Browne PRL, Rowland JV. 2016. Gold and silver resources in Taupo Volcanic Zone geothermal systems. Geothermics. 59:205-214.

Simpson MP, Christie AB. 2019. Hydrothermal alteration mineralogical footprints for New Zealand epithermal Au-Ag deposits. New Zealand Journal of Geology and Geophysics. doi: 10.1080/00288306.2019.1577278.

Simpson MP, Gazley MF, Stuart AGJ, Pearce MA, Birchall R, Chappell D, Christie AB, Stevens MR.2019. Hydrothermal alteration at the Karangahake epithermal Au-Ag deposit, Hauraki goldfield, New Zealand. Economic Geology. 114:243-273.

Stephens S, MacKenzie DJ, Barth N, Craw D. 2015. Links between orogenic and placer gold on the Old Man Range, Central Otago, New Zealand New Zealand Journal of Geology and Geophysics. 58:296-312. doi: 10.1080/00288306.2015.1070181.

Upton P, Craw D. 2014. Modelling of structural and lithological controls on mobility of fluids and gold in orogenic belts, New Zealand. In: Garofalo PS, Ridley JR, editors. Gold-Transporting Hydrothermal Fluids in the Earth's Crust. Geological Society of London Special Publication. 402:231-253.

Vaughan JR, Hickey KA, Barker SLL. 2016. Isotopic, chemical, and textural evidence for pervasive calcite dissolution and precipitation accompanying hydrothermal fluid flow in low-temperature, carbonate-hosted, gold systems. Economic Geology. 111(5):1127-1157. doi: [10.2113/econgeo.111.5.1127](https://doi.org/10.2113/econgeo.111.5.1127)**.**

Westall F, Campbell KA, Bréhéret J-G, Foucher F, Gautret P, Hubert A, Sorieul S, Grassineau N, Guido DM. 2015. Archean (3.33 Ga) microbe-sediment systems were diverse and flourished in a hydrothermal context. Geology. 43:615-618. doi:10.1130/G36646.1

Wilson CJN, Rowland JV. 2016. The volcanic, magmatic and tectonic setting of the Taupo Volcanic Zone, New Zealand, reviewed from a geothermal perspective. Geothermics. 59:168-187. doi: 10.1016/j.geothermics.2015.06.013.

**GNS Science reports**

Hamilton AR, Campbell KA, Guido DM. 2019. Atlas of siliceous hot spring deposits (sinter) and other silicified surface manifestations in epithermal environments. GNS Science Report. 2019/06. 56 p. doi:10.21420/BQDR-XQ16.

Simmons SF. 2017. Proximal to distal hydrothermal alteration patterns around epithermal low-intermediate sulfidation vein deposits and their implications for precious metal exploration. GNS Science Report. 2017/28. 38 p. doi:10.21420/G2FW6C.

Simmons SF. 2019. The geometry and evolution of the boiling zone that produced the Favona ore bodies in the Hauraki Goldfield, and the implications for exploration. GNS Science Report. 2019/02. 29 p. doi:10.21420/393T-G091.

Simpson MP, Christie AB. 2016. Exploration of New Zealand mineral deposits and geothermal systems using X-ray diffraction (XRD) and reflectance spectrometry (SWIR): a comparison of techniques. GNS Science Report. 2016/61. 45 p. doi: 10.21420/G2NP4D

Stagpoole VM, Caratori Tontini F, Soengkono S, Rattenbury M, Henderson S. 2015. Inversion and quantitative analysis of airborne geophysical survey data from the Taupo Volcanic Zone. GNS Science Report 2013/51. 35 p

Turner GM, Kellett RL, Caratori Tontini F, Stagpoole VM, Christie AB. 2017. Magnetic properties of volcanic rocks from the Coromandel. GNS Science Report. 2017/27.

**Conference papers**

Allibone AH, MacKenzie DJ, Turnbull RE, Tulloch AJ, Craw D, Palin M. 2015. Targeting granite-related Mo, W, Ag, Au deposits on the margin of Paleozoic Gondwana in western New Zealand. Proceedings of the 48th annual conference 2015, Dunedin, The Australasian Institute of Mining and Metallurgy, New Zealand Branch; p. 11-21.

Bahiru EA, Rowland JV, Eccles JD, Kellett RL. 2016. Structural patterns in northern New Zealand: insights into the localisation and geometry of epithermal Au-Ag mineralisation within the Hauraki Goldfield. Proceedings of the 49th annual conference 2016, Wellington, The Australasian Institute of Mining and Metallurgy, New Zealand Branch; p. 16-25.

Barker SLL, Cummins M, Nortje G. 2017. Lithogeochemical classification of volcanic rocks in the Waitekauri Valley, Coromandel Peninsula, New Zealand. Proceedings of the 50th annual conference 2017, Christchurch, The Australasian Institute of Mining and Metallurgy, New Zealand Branch; p. 19-27.

Blakemore H, Allibone AH, Craw D, MacKenzie DJ, Moore J, Jones P. 2019. Structural setting and discovery of new resources within the Hyde-Macraes Shear Zone, Macraes mine, New Zealand. Proceedings of the PACRIM 2019 Congress, Mineral systems of the Pacific rim; April 3-5; Auckland; The Australasian Institute of Mining and Metallurgy Publication Series. 1/2019:249-251.

Christie AB. 2015. Minerals systems model for epithermal Au-Ag deposits of the Hauraki Goldfield, New Zealand. Pp. 61-63 in: André-Mayer AS, Cathelineau M, Muchez Ph, Pirard E, Sindern S editors. Proceeding of the 13th Biennial SGA Meeting, 24-27 August 2015, Nancy, France.

Christie AB. 2016. Mineral systems model for epithermal Au-Ag deposits of the Hauraki Goldfield. Proceedings of the 49th annual conference 2016, Wellington, The Australasian Institute of Mining and Metallurgy, New Zealand Branch; p. 46-49.

Christie AB, Barker RG. 2015. Exploration for epithermal gold deposits in New Zealand. Proceedings of the PACRIM 2015 Congress; March 18-21; Hong Kong; The Australasian Institute of Mining and Metallurgy Publication Series. 2/2015:533-539.

Christie AB, Brathwaite RL, Simpson MP. 2017. Paleodepth indicators for targeting and vectoring of epithermal Au-Ag deposits: examples from the Hauraki Goldfield, New Zealand. Proceedings of the 14th SGA Biennial Meeting, Mineral Resources to Discover, Quebec City, August 20-23, 2017, Volume 3:1073-1076.

Craw D. 2017. Fluids and Orogenic Gold in the South Island, New Zealand. Extended abstracts, Gold 17 Symposium, 21 to 23 February 2017, Rotorua. Australian Institute of Geoscientists Bulletin. 63:19-22.

Craw, D. 2019. Orogenic deposits: new approaches to old goldfields in New Zealand. Proceedings of the PACRIM 2019 Congress, Mineral systems of the Pacific rim; April 3-5; Auckland, New Zealand; The Australasian Institute of Mining and Metallurgy Publication Series. 1/2019:14-20.

Craw D, MacKenzie DJ, Grieve P. 2015. Supergene gold: implications for exploration in the Otago Schist. Proceedings of the 48th annual conference 2015, Dunedin, The Australasian Institute of Mining and Metallurgy, New Zealand Branch; p. 73-79.

Craw D, MacKenzie DJ, Lilly K. 2016. Southland gold nuggets: sources on the southwest margin of the Otago Schist? Proceedings of the 49th annual conference 2016, Wellington, The Australasian Institute of Mining and Metallurgy, New Zealand Branch; p. 52-60.

Craw D, Upton P. 2015. Tectonic severance of links between placer gold and its sources, southern New Zealand. Proceedings of the PACRIM 2015 Congress; March 18-21; Hong Kong; The Australasian Institute of Mining and Metallurgy Publication Series. 2/2015:541-544.

Dickie JE, Scott JM, Blakemore H. 2015. Timing and conditions of mineralisation of the Blackwater Creek dike, Reefton, New Zealand. Proceedings of the 48th annual conference 2015, Dunedin, The Australasian Institute of Mining and Metallurgy, New Zealand Branch; p. 81-89.

Durance PMJ, Ashraf S, Rae A, Kereszturi G. 2017. WorldView-3 survey of Macraes Flat, South Island, New Zealand. Proceedings of the 50th annual conference 2017, Christchurch, The Australasian Institute of Mining and Metallurgy, New Zealand Branch; p. 366-370

Durance PMJ, Christie AB, McIntosh C, Carder M. 2015. The composition of disseminated, gold-bearing sulphides within the three-dimensional framework of bulk Au, As and Sb in the Globe Progress orogenic gold deposit, Reefton Goldfield, New Zealand. Proceedings of the PACRIM 2015 Congress; March 18-21; Hong Kong; The Australasian Institute of Mining and Metallurgy Publication Series. 2/2015:327-333.

Durance PMJ, Trompetter WJ. 2017. Palaeozoic orogenic gold in New Zealand: the Globe-Progress shear zone viewed through pyrite trace element geochemistry. Proceedings of the 14th SGA Biennial Meeting, Mineral Resources to Discover, Quebec City, August 20-23, 2017, Volume 1: 135-137.

Durance PMJ, Trompetter B, Christie AB, McIntosh C. 2015. Trace element geochemistry of gold-bearing pyrite from the Globe-Progress orogenic gold deposit, Reefton Goldfield, New Zealand. Proceedings of the 48th annual conference 2015, Dunedin, The Australasian Institute of Mining and Metallurgy, New Zealand Branch; p. 101-108.

Eames AG, Barker SLL, Durance PMJ. 2016. Potential proof of magmatic influence during gold production in the Waihi epithermal system from pyrite zoning. Proceedings of the 49th annual conference 2016, Wellington, The Australasian Institute of Mining and Metallurgy, New Zealand Branch; p. 90-99.

Gazley MF, Pearce MA, Simpson MP. 2017. A comparison of a bonanza-grade epithermal vein from Karangahake, Hauraki Goldfield, to a geothermal system. Extended abstracts, Gold 17 Symposium, 21 to 23 February 2017, Rotorua. Australian Institute of Geoscientists Bulletin. 63:37-39.

Grant K, Craw D, Scott J, Blakemore H 2018. Mobilisation of Au and Ag in clay-altered Otago Schist at Coronation North, Macraes Mine. Proceedings of the 51st annual conference 2018, Tauranga, The Australasian Institute of Mining and Metallurgy, New Zealand Branch; p. 363-369.

Grieve PL, Craw D, Hinchey B. 2015. Supergene gold at Blackstone Hill, North Raggedy Range, Central Otago – rediscovering some of the past riches of the Central Otago Goldfield. Proceedings of the 48th annual conference 2015, Dunedin, The Australasian Institute of Mining and Metallurgy, New Zealand Branch; p. 141-148.

Hamilton AR, Campbell KA, Rowland JV. 2015. Siliceous sinters as tools for epithermal exploration. Proceedings of the 48th annual conference 2015, Dunedin, The Australasian Institute of Mining and Metallurgy, New Zealand Branch; p. 149-159.

Hamilton AR, Campbell KA, Rowland JV, Barker SLL. 2016. Geochemical signatures of siliceous sinters in relation to epithermal mineralisation. Proceedings of the 49th annual conference 2016, Wellington, The Australasian Institute of Mining and Metallurgy, New Zealand Branch; p. pp 121-131.

Hughes RM, Barker SLL. 2016. Development of portable XRF for the exploration of low-sulphidation epithermal veins: a Waihi case study. Proceedings of the 49th annual conference 2016, Wellington, The Australasian Institute of Mining and Metallurgy, New Zealand Branch; p. 152-162.

Hughes RM, Barker SLL. 2017. Distinguishing adularia haloes around low-sulfidation epithermal veins using portable X-ray fluorescence. Proceedings of the 14th SGA Biennial Meeting, Mineral Resources to Discover, Quebec City, August 20-23, 2017, Volume 3: 1135-1138.

Hughes RM, Barker SLL, Gazley MF. 2017. Detecting and mapping adularia alteration in the Waihi system, using TESCAN integrated mineral analysis, X-ray diffraction and portable X-ray fluorescence. Proceedings of the 50th annual conference 2017, Christchurch, The Australasian Institute of Mining and Metallurgy, New Zealand Branch; p. 403-412.

Kellett RL, Christie AB. 2016. Extending the depth and breadth of geophysical exploration for epithermal deposits. Proceedings of the 49th annual conference 2016, Wellington, The Australasian Institute of Mining and Metallurgy, New Zealand Branch; p. 163-171.

King A, MacKenzie DJ. 2016. Lot’s Wife prospect, East Otago, New Zealand. Proceedings of the 49th annual conference 2017, Wellington, The Australasian Institute of Mining and Metallurgy, New Zealand Branch; p. 183-193.

King A, MacKenzie DJ. 2017. Paragenesis and structure of a high-grade, high angle, gold-bearing quartz vein at Macraes mine, East Otago, NZ. Proceedings of the 50th annual conference 2017, Christchurch, The Australasian Institute of Mining and Metallurgy, New Zealand Branch; p. 436-446.

Lee RJ, Barker SLL. 2015. Carbonate alteration and geochemistry at the Sams Creek gold deposit, New Zealand. Proceedings of the 48th annual conference 2015, Dunedin, The Australasian Institute of Mining and Metallurgy, New Zealand Branch; p. 221-230.

MacKenzie DJ, Craw D. 2016: Structural and geophysical domains in the southwestern side of the Otago Schist belt, New Zealand. Proceedings of the 49th annual conference 2016, Wellington, The Australasian Institute of Mining and Metallurgy, New Zealand Branch; p. 223-232.

MacKenzie DJ, Craw D. 2017. Geophysical Signals and Exploration for Orogenic Gold on the low-grade Margins of the Otago Schist. Extended abstracts, Gold 17 Symposium, 21 to 23 February 2017, Rotorua. Australian Institute of Geoscientists Bulletin. 63:62-65.

MacKenzie DJ, Craw D, Fierz G. 2017. Exploring for gold-bearing shear zones on the southwestern side of the Otago Schist belt, New Zealand. Proceedings of the 50th annual conference 2017, Christchurch, The Australasian Institute of Mining and Metallurgy, New Zealand Branch; p. 145-153.

MacKenzie DJ, Craw D, Martin A. 2015. Mapping magnetic greenschist units to deduce structure in the Otago Schist, East Otago, NZ. Proceedings of the 48th annual conference 2015, Dunedin, The Australasian Institute of Mining and Metallurgy, New Zealand Branch; p. 231-240.

MacKenzie DJ, Mason A, Stevens S, Craw D. 2018. Controls on gold mineralisation at the SE end of the Hyde-Macraes Shear Zone, East Otago, NZ. Proceedings of the 51st annual conference 2018, Tauranga, The Australasian Institute of Mining and Metallurgy, New Zealand Branch; p. 189-198.

Martin AP, Allibone AH, Blakemore H, Blundell CC, Cox SC, Craw D, Doyle S, MacKenzie DJ, Mortimer N, Rattenbury M, Ritchie T, Smillie RW, Smith Lyttle B, Stevens S. 2018. A new 1:50,000 scale map and GIS dataset of the Hyde-Macraes Shear Zone. Proceedings of the 51st annual conference 2018, Tauranga, The Australasian Institute of Mining and Metallurgy, New Zealand Branch; p. 211-220.

Martin AP, MacKenzie DJ, Blundell C, Cox SC, Henderson S. 2017. Structural and lithological variation around Serpentine Diggings, Central Otago, New Zealand. Proceedings of the 50th annual conference 2017, Christchurch, The Australasian Institute of Mining and Metallurgy, New Zealand Branch; p. 382-390.

Martin AP, Strong DT, Rattenbury MS, Turnbull RE, Durance PMJ, Stucker VK, Morgenstern R. 2017. Soil geochemistry for mineral exploration in Otago-northern Southland. Proceedings of the 50th annual conference 2017, Christchurch, The Australasian Institute of Mining and Metallurgy, New Zealand Branch; p. 381-390.

Mering JA, Barker SLL. 2016. New isotopic constraints on carbonate at Waihi from laser spectroscopy. Proceedings of the 49th annual conference 2016, Wellington, The Australasian Institute of Mining and Metallurgy, New Zealand Branch; p. 281-289.

Mering JA, Barker SLL. 2017. Laser spectroscopy: an emerging stable isotope technology with vector potential in epithermal deposits. Proceedings of the 14th SGA Biennial Meeting, Mineral Resources to Discover, Quebec City, August 20-23, 2017, Volume 3: 1147-1150. (poster presentation)

Mering JA, Barker SLL. 2018. Applying laser spectroscopy to measure isotopic alteration in carbonates and phyllosilicates at Waihi. Proceedings of the 51st annual conference 2018, Tauranga, The Australasian Institute of Mining and Metallurgy, New Zealand Branch; p. 231-233.

Mortimer N. 2017. Zealandia Continental-setting of Otago Schist Gold Mineralisation. Extended abstracts, Gold 17 Symposium, 21 to 23 February 2017, Rotorua. Australian Institute of Geoscientists Bulletin. 63:70-72.

Pearce MA, Gazley MF, Simpson MP, Godel B. 2016. High-resolution microcharacterisation of bonanza-grade epithermal vein samples from the Hauraki Goldfield. Proceedings of the 49th annual conference 2016, Wellington, The Australasian Institute of Mining and Metallurgy, New Zealand Branch; p. 312-320.

Pickering DJ, Scott JM, MacKenzie DJ, Blakemore H. 2018. Textural and chamical types of scheelite at Golden Point, Macraes mine, New Zealand. Proceedings of the 51st annual conference 2018, Tauranga, The Australasian Institute of Mining and Metallurgy, New Zealand Branch; p. 407-416.

Pogacnki J, Rowland JV, Archer R. 2016. Numerical investigation of the effect of deep fault structures. Proceedings of the 49th annual conference 2016, Wellington, The Australasian Institute of Mining and Metallurgy, New Zealand Branch; p. 332-341.

Robinson BA, MacKenzie DJ. 2017. Structural setting in the mineralised veins in the Waipori goldfield, South Otago, New Zealand. Proceedings of the 50th annual conference 2017, Christchurch, The Australasian Institute of Mining and Metallurgy, New Zealand Branch; p. 429-436.

Schofield MD, Barker SLL, Durance PJM, Rowland JV, Simpson MP, Stevens, MR. 2016. Geochemical footprints and structural localisation of ore-grade Au mineralisation: insights from the Karangahake deposit, New Zealand. Proceedings of the 49th annual conference 2016, Wellington, The Australasian Institute of Mining and Metallurgy, New Zealand Branch; p. 358-372.

Shand F, Scott J, Blakemore H. 2015. Structural controls and mineralising fluids at the Big River South – St George Au deposits, Reefton. Proceedings of the 48th annual conference 2015, Dunedin, The Australasian Institute of Mining and Metallurgy, New Zealand Branch; p. 395-403.

Simpson MP. 2015. Reflectance spectrometry (SWIR) of alteration minerals surrounding the Favona epithermal vein, Waihi vein system, Hauraki Goldfield. Proceedings of the 48th annual conference 2017, Dunedin, The Australasian Institute of Mining and Metallurgy, New Zealand Branch; p. 409-418.

Simpson MP. 2017. Microthermometry of deep veins from the Waihi, Karangahake and Tui epithermal vein deposits, southern Hauraki Goldfield. Proceedings of the 50th annual conference 2017, Christchurch, The Australasian Institute of Mining and Metallurgy, New Zealand Branch; p. 284-293.

Simpson MP. 2017. Short-wave Infra-red (SWIR) reflectance spectroscopy characterisation of alteration minerals in New Zealand gold deposits. Extended abstracts, Gold 17 Symposium, 21 to 23 February 2017, Rotorua. Australian Institute of Geoscientists Bulletin. 63:93-97.

Simpson MP. 2018. Hyperspectral (SWIR) characterisation of alteration at the Wharekiraupona epithermal Au-Ag prospect, Hauraki Goldfield, New Zealand. Proceedings of the 51st annual conference 2018, Tauranga, The Australasian Institute of Mining and Metallurgy, New Zealand Branch; p. 287-293.

Simpson MP, Bignall G, Rae AJ, Christie AB, Chambefort I. 2015. Mapping hydrothermal minerals in New Zealand geothermal fields using reflectance spectroscopy (VNIR-SWIR) and application to mineral deposit exploration. Proceedings of the PACRIM 2015 Congress; March 18-21; Hong Kong; The Australasian Institute of Mining and Metallurgy Publication Series. 2/2015:243-247.

Simpson MP, MacKenzie DJ, Craw D, Doyle S. 2016. Short-wave Infrared (SWIR) reflectance spectrometry studies of alteration at Frasers underground, Macraes gold mine, Otago, New Zealand. Proceedings of the 49th annual conference 2016, Wellington, The Australasian Institute of Mining and Metallurgy, New Zealand Branch; p. 385-396.

Simpson MP, Stuart AGJ, Gazley MF, Birchall R, Chappell D, Christie AB, Stevens MR. 2017. Microcharacterisation of hydrothermal alteration at the Karangahake epithermal deposit, Hauraki Goldfield, New Zealand. Proceedings of the 50th annual conference 2017, Christchurch, The Australasian Institute of Mining and Metallurgy, New Zealand Branch; p. 270-283.

Stick G, MacKenzie DJ, Scott J. 2015. The Energetic gold mine, Reefton goldfield, New Zealand. Proceedings of the 48th annual conference 2015, Dunedin, The Australasian Institute of Mining and Metallurgy, New Zealand Branch; p. 447-457.

Upton P, Craw D. 2015. Modelling structural and lithological controls on the mobility of fluids and gold in orogenic belts: examples from NewZealand and Taiwan. Proceedings of the PACRIM 2015 Congress; March 18-21; Hong Kong; The Australasian Institute of Mining and Metallurgy Publication Series. 2/2015:189-192.

Upton P, Craw D. 2017. Effects of earthquake-driven fluid flow on metal mobility and deposition. Proceedings of the 50th annual conference 2017, Christchurch, The Australasian Institute of Mining and Metallurgy, New Zealand Branch; p. 344-352.

Upton P, Craw D, Reyners M, Eberhart-Phillips D. 2019. Regional crustal structure, fluid and metal transport pathways of Otago illuminated by geophysics. Proceedings of the PACRIM 2019 Congress, Mineral systems of the Pacific rim; April 3-5; Auckland, New Zealand; The Australasian Institute of Mining and Metallurgy Publication Series. 1/2019:260-262.

Wellnitz K, Scott J, Palin M, Craw D, Martin C, Reid M, Stirling C, Wombacher F. 2017. Element and isotope mobility in CO2-bearing Shotover hydrothermal Au-bearing systems in the Otago Schist. Proceedings of the 50th annual conference 2017, Christchurch, The Australasian Institute of Mining and Metallurgy, New Zealand Branch; p. 253-262.

**Conference abstracts**

Allibone AH, MacKenzie DJ, Turnbull RE, Tulloch AJ, Craw D. 2014. Metallogenesis along the margin of Gondwana in southern New Zealand. Geosciences 2014 Conference, New Plymouth. Geoscience Society of New Zealand miscellaneous publication 139A, p. 2.

Bahiru EA, Eccles JD, Rowland JV. 2018. Structural control on epithermal mineralisation in the southern Coromandel Volcanic Zone (CVZ), New Zealand: insights from potential field analysis. Proceedings of the 51st annual conference 2018, Tauranga, The Australasian Institute of Mining and Metallurgy, New Zealand Branch; p. 347.

Barker SLL. 2015. Giant deposits, giant stable isotope haloes? Society of Economic Geologists conference, Hobart, Tasmania, September, 2015.

Barker SLL. 2017. Geochemical footprints of low-sulfidation epithermal gold deposits. Extended abstracts, Gold 17 Symposium, 21 to 23 February 2017, Rotorua. Australian Institute of Geoscientists Bulletin. 63:8-9.

Christie AB. 2015. [Cu, Zn and Pb geochemistry of stream sediment samples from mineral exploration surveys, Hauraki Goldfield, New Zealand](https://goldschmidtabstracts.info/abstracts/abstractView?id=2015001612). Goldschmidt Conference, Prague; August 16-21.

Christie AB. 2015. Mineral diversity in epithermal Au-Ag deposits of the Hauraki Goldfield, New Zealand. Society of Economic Geologists conference, Hobart, Tasmania, September, 2015.

Christie AB. 2016. Mineral diversity in epithermal Au-Ag deposits of the Hauraki Goldfield. Proceedings of the 49th annual conference 2016, Wellington, The Australasian Institute of Mining and Metallurgy, New Zealand Branch; p. 45.

Christie AB. 2016. Paleodepth indicators for targeting and vectoring of epithermal Au-Ag deposits: examples from the Hauraki Goldfield. Proceedings of the 49th annual conference 2016, Wellington, The Australasian Institute of Mining and Metallurgy, New Zealand Branch; p. 46.

Christie AB. 2017. Evolving exploration models for epithermal Au-Ag deposits in the Hauraki Goldfield, New Zealand. Proceedings FUTORES II conference, Townsville.

Christie AB. 2017. Targeting epithermal Au-Ag deposits in the Hauraki Goldfield, New Zealand. Extended abstracts, Gold 17 Symposium, 21 to 23 February 2017, Rotorua. Australian Institute of Geoscientists Bulletin. 63:13-14.

Durance PMJ, Trompetter B, Christie AB, McIntosh C. 2015. Disseminated Gold in the Reefton Goldfields: example from Oceana Gold’s Globe Mine showing the Benefits of microanalysis using PIXE and EMPA. Society of Economic Geologists conference, Hobart, Tasmania, September, 2015.

Gazley MF, Simpson MP, Brathwaite RL, Pearce M, Birchall R. 2017. Application of rapid mineral analysis by scanning electron microscopy to mineral deposits. Proceedings of the 50th annual conference 2017, Christchurch, The Australasian Institute of Mining and Metallurgy, New Zealand Branch; p. 75.

Guzman S, Kaipio J. 2018. Modelling uncertainties with gravity and petrophysical data. Proceedings of the 51st annual conference 2018, Tauranga, The Australasian Institute of Mining and Metallurgy, New Zealand Branch; p. 371.

Hamilton AR, Campbell KR, Rowland JV, Barker SLL. 2017. Utilising siliceous sinters in exploration of the epithermal environment. Extended abstracts, Gold 17 Symposium, 21 to 23 February 2017, Rotorua. Australian Institute of Geoscientists Bulletin. 63:46-48.

Hamilton AR, Campbell KR, Rowland JV. 2018. Detailed analysis of siliceous sinters to access epithermal mineralisation potential. Proceedings of the 51st annual conference 2018, Tauranga, The Australasian Institute of Mining and Metallurgy, New Zealand Branch; p. 151.

Kellett RL, Tontini Caratori F, Bahiru EA, Christie AB, Rowland JV, Eccles JD. 2015. Updating the Golden Cross story on the Coromandel Peninsula: a geophysical perspective. Geosciences 2015 Conference, Wellington. Geoscience Society of New Zealand Miscellaneous Publication. 143a, p. 75.

MacKenzie DJ, Grant M, Blakemore H, Jone P, Craw D. 2019. Textures and grain size of scheelite as a potential byproduct, Macraes Au mine, New Zealand. PACRIM 2019 Congress, Mineral systems of the Pacific rim; April 3-5; Auckland; The Australasian Institute of Mining and Metallurgy Publication Series. 1/2019; p. 270.

Mortimer N. 2017. Engines for North Island Miocene epithermal mineralisation: an offshore perspective. Proceedings of the 50th annual conference 2017, Christchurch, The Australasian Institute of Mining and Metallurgy, New Zealand Branch; p. 184.

Mortimer N, Lee J, Stockli D. 2015. Timing of movement on Otago Schist low angle faults from (U-Th)/He zircon thermochronology. Proceedings of the 48th annual conference 2015, Dunedin, The Australasian Institute of Mining and Metallurgy, New Zealand Branch; p. 295.

Reyes AG. 2016. Effects of heat, fluids and structures on mineral deposition: evidence from geothermal systems. Abstracts, Goldschmidt conference, 26 June-1 July 2016, Yokohama, Japan.

Rowland JV, Bahiru EA, Pogacnik J. 2017. The Influence of Inherited Structure on Localisation of Epithermal Gold Mineralisation. Extended abstracts, Gold 17 Symposium, 21 to 23 February 2017, Rotorua. Australian Institute of Geoscientists Bulletin. 63:86-88.

Rowland JV, Simmons SF. 2015: Tectonic controls on the epithermal ore forming environment, Northern New Zealand. 2015 Geological Society of Nevada Symposium.

Schofield MD, Barker SLL, Durance PMJ, Rowland JV, Stevens MR. 2015. Structural controls and geochemical footprints as vectors to ore-grade gold mineralisation: Insights from the Karangahake Au-Ag epithermal deposit, New Zealand. Geoscience 2015 Conference, Wellington. Geoscience Society of New Zealand miscellaneous publication 143A, p. 118.

Scott J. 2017. Ductile and brittle orogenic and igneous-related mineralisation within the Reefton Goldfield, New Zealand. Extended abstracts, Gold 17 Symposium, 21 to 23 February 2017, Rotorua. Australian Institute of Geoscientists Bulletin. 63:89.

Scott J. 2017. Fluids that made Otago greenschists orange and carbonate veins golden. Extended abstracts, Gold 17 Symposium, 21 to 23 February 2017, Rotorua. Australian Institute of Geoscientists Bulletin. 63:90.

Simpson MP, Christie AB. 2015. The Karangahake epithermal Au-Ag deposit Hauraki Goldfield, New Zealand: a telescoped vein system? Society of Economic Geologists conference, Hobart, Tasmania, September, 2015.

Wellnitz AK, Scott JM, Palin JM, Craw D, Martin CE, Holk GJ, Wombacher F. 2014. Chemistry of carbonate veins, the origin of their components and the alteration haloes around them: a case study from western Otago. Geosciences 2014 Conference, New Plymouth. Geoscience Society of New Zealand Miscellaneous Publication. 139A, p. 116.

**Posters reproduced in conference proceedings volume**

Carson L. 2017. Structure and alteration in the Broken Hills district, Coromandel Peninsula. Proceedings of the 50th annual conference 2017, Christchurch, The Australasian Institute of Mining and Metallurgy, New Zealand Branch; p. 371.

Durance PMJ, Ashraf S, Rae A, Kerezturi G. 2017. WorldView-3 survey of Macraes Flat, South Island, New Zealand. Proceedings of the 50th annual conference 2017, Christchurch, The Australasian Institute of Mining and Metallurgy, New Zealand Branch; p. 376.

Grant K, Craw D, Scott J, Blakemore H 2018. Mobilisation of Au and Ag in clay-altered Otago Schist at Coronation North, Macraes Mine. Proceedings of the 51st annual conference 2018, Tauranga, The Australasian Institute of Mining and Metallurgy, New Zealand Branch; p. 370.

Guzman S, Kaipio J. 2018. Modelling uncertainties with gravity and petrophysical data. Proceedings of the 51st annual conference 2018, Tauranga, The Australasian Institute of Mining and Metallurgy, New Zealand Branch; p. 372.

Hamilton AR, Campbell KA, Rowland JV, Barker SLL. 2017. Variation amongst the siliceous sinters of the Hauraki Goldfield: implications for mineralisation potential. Proceedings of the 50th annual conference 2017, Christchurch, The Australasian Institute of Mining and Metallurgy, New Zealand Branch; p. 402.

Hamilton AR, Campbell KA, Rowland JV. 2018. Detailed analysis of siliceous sinters to access epithermal mineralisation potential. Proceedings of the 51st annual conference 2018, Tauranga, The Australasian Institute of Mining and Metallurgy, New Zealand Branch; p. 152.

King A, MacKenzie DJ. 2017. An investigation into the paragenesis and structure of high-grade, high angle gold veins at Macraes in the Hyde-Macraes Shear Zone. Proceedings of the 50th annual conference 2017, Christchurch, The Australasian Institute of Mining and Metallurgy, New Zealand Branch; p. 426.

Pickering DJ, Scott JM, MacKenzie DJ, Blakemore H. 2018. Textural and chamical types of scheelite at Golden Point, Macraes mine, New Zealand. Proceedings of the 51st annual conference 2018, Tauranga, The Australasian Institute of Mining and Metallurgy, New Zealand Branch; p. 417.

Scanlan E, Scott J. 2017. Textures and geochemistry of W-mineralised veins in Glenorchy, New Zealand. Proceedings of the 50th annual conference 2017, Christchurch, The Australasian Institute of Mining and Metallurgy, New Zealand Branch; p. 437.

Wilson V, Scott J, Craw D. 2017. Mineralisation of Au and W at the Bendigo Goldfield, Central Otago. Proceedings of the 50th annual conference 2017, Christchurch, The Australasian Institute of Mining and Metallurgy, New Zealand Branch; p. 440.

**Unpublished reports**

MacKenzie DJ. 2015. Scheelite study: different styles of scheelite mineralisation at Round Hill and comparisons to the FRUG metallurgical trial site. Unpublished report prepared for OceanaGold NZ Ltd. 27 p.

MacKenzie DJ. 2015. Scheelite study: scheelite mineralisation at Round Hill, Macraes, east Otago, New Zealand. Unpublished report prepared for OceanaGold NZ Ltd. 15 p.

MacKenzie DJ. 2017. Mineralisation and structure of the Hyde-Macraes Shear Zone at Coronation North, East Otago, NZ. Unpublished report prepared for OceanaGold NZ Ltd. 21 p.

Simpson MP. 2015. Reflectance spectroscopy survey of the Favona epithermal Au-Ag deposit: preliminary results and qualification of clay minerals. Unpublished report prepared for Newmont. 7 p.

Simpson MP. 2015. Reflectance spectroscopy of Correnso and Favona: Preliminary appraisal of Newmont collected spectral data. Unpublished report prepared for Newmont. 16 p.

Simpson MP. 2016. A re-examination of reflectance spectroscopy data for the Macraes gold deposit: Preliminary results. Unpublished report plus associated spread sheets prepared for OceanaGold. 15 p.
